# Supplementary material for: Deteriorated Dietary Patterns with Regards to Health and Environmental Sustainability among Hungarian Roma Are Not Differentiated from Those of the General Population
Source: MDPI journal article supplement (doi:10.3390/nu13030721), 2021-02-24
Supplement: s1 [file s1]

## Contents

|                                                                                                                                                                       |   |
|-----------------------------------------------------------------------------------------------------------------------------------------------------------------------|---|
| Table S1. Healthy diet indicator components used in the current study and their coding criteria based on the World Health Organization's dietary guidelines [1] ..... | 2 |
| Table S2. Nutrient Targets for DASH Score [3].....                                                                                                                    | 2 |
| Table S3. Diet indicator components used in the current study and their coding criteria based on the EAT-Lancet reference diet [2].....                               | 2 |
| Table S4. Regression models for DASH score among Hungarian general and Roma populations.....                                                                          | 3 |
| Table S5. Regression models for HDI score among Hungarian general and Roma subjects.....                                                                              | 3 |
| Table S6. Regression models for DII score among Hungarian general and Roma subjects .....                                                                             | 3 |
| Table S7. Regression models for nutrient-based EAT-Lancet score among Hungarian general and Roma subjects .....                                                       | 4 |
| References .....                                                                                                                                                      | 4 |

**Table S1. Healthy diet indicator components used in the current study and their coding criteria based on the World Health Organization's dietary guidelines [1]**

| No. | Nutrient or food group ( <i>daily intake</i> ) | Dichotomous value |            |
|-----|------------------------------------------------|-------------------|------------|
|     |                                                | 1                 | 0          |
| 1   | Saturated fatty acids (%E)                     | 0-10              | >10        |
| 2   | Polyunsaturated fatty acids (%E)               | 6-10              | <6 or >10  |
| 3   | Protein (%E)                                   | 10-15             | <10 or >15 |
| 4   | Total dietary fibre (g)                        | >25               | <25        |
| 5   | Monosaccharides and disaccharides (%E)         | 0-10              | >10        |
| 6   | Cholesterol (mg)                               | 0-300             | >300       |
| 7   | Potassium (mg)                                 | ≥3500             | <3500      |

E%: Nutrient given as percentage of total daily energy; g: grams; mg: milligrams.

**Table S2. Nutrient Targets for DASH Score [3]**

| Nutrient       | DASH Diet Nutrient Composition | DASH Target       | Intermediate Target |
|----------------|--------------------------------|-------------------|---------------------|
| Saturated fats | 6%E                            | 6%E               | 11%E                |
| Total fat      | 27%E                           | 27%E              | 32%E                |
| Protein        | 18%E                           | 18%E              | 16.5%E              |
| Cholesterol    | 150 mg                         | 71.4 mg/1000 kcal | 107.1 mg/1000 kcal  |
| Fibre          | 31 g                           | 14.8 g/1000 kcal  | 9.5 g/1000 kcal     |
| Magnesium      | 500 mg                         | 238 mg/1000 kcal  | 158 mg/1000 kcal    |
| Calcium        | 1240 mg                        | 590 mg/1000 kcal  | 402 mg/1000 kcal    |
| Potassium      | 4700 mg                        | 2238 mg/1000 kcal | 1534 mg/1000 kcal   |
| Sodium         | 2400 mg                        | 1143 mg/1000 kcal | 1286 mg/1000 kcal   |

<sup>a</sup>Based on a 2100-kcal diet. Abbreviation: DASH, Dietary Approaches to Stop Hypertension trial [4]. E%: Nutrient given as percentage of total daily energy; g: grams; mg: milligrams.

**Table S3. Diet indicator components used in the current study and their coding criteria based on the EAT-Lancet reference diet [2]**

| Dietary element                     | Reference amount | E%*                    |
|-------------------------------------|------------------|------------------------|
| Alpha linolenic acid (g)            | ≥2.5             | ≥0.9                   |
| Carbohydrates (g)                   | ≥317.3           | ≥50.8                  |
| Cholesterol (mg)                    | ≤125.2           | ≤50.1 (mg/1000 kcal)   |
| Dietary fibres (g)                  | ≥42.9            | ≥6.9                   |
| Mono- and poly-unsaturated fats (g) | ≥75.9            | ≥27.3                  |
| Proteins (g)                        | 90.1             | 14.4                   |
| Saturated fats (g)                  | ≤22.7            | ≤8.2                   |
| Total fat (g)                       | ≤105.6           | ≤38.0                  |
| Calcium (mg)                        | ≥717.8           | ≥287.1 (mg/1000 kcal)  |
| Magnesium (mg)                      | ≥732.5           | ≥293.0 (mg/1000 kcal)  |
| Potassium (mg)                      | ≥4100.7          | ≥1640.3 (mg/1000 kcal) |
| Added sugar (g)                     | ≤31.0            | 5.0                    |

\*Dietary element expressed as percentage of total energy, unless otherwise indicated. g: grams; mg: milligrams.

**Table S4. Regression models for DASH score among Hungarian general and Roma populations**

| DASH <sup>†</sup>                              | MODEL 1<br>$\beta$ [95%CI]   | MODEL 2<br>$\beta$ [95%CI]   | MODEL 3<br>$\beta$ [95%CI]   |
|------------------------------------------------|------------------------------|------------------------------|------------------------------|
| Roma                                           | -0.023 [-0.176 ; 0.129]      | -0.084 [-0.286 ; 0.117]      | -0.049 [-0.254 ; 0.156]      |
| BMI (kg/m <sup>2</sup> )                       | 0.004 [-0.008 ; 0.016]       | 0.005 [-0.008 ; 0.018]       | 0.005 [-0.008 ; 0.018]       |
| Energy intake (kcal)                           | <b>0.000 [0.000 ; 0.000]</b> | <b>0.000 [0.000 ; 0.000]</b> | <b>0.000 [0.000 ; 0.000]</b> |
| Age (years)                                    |                              | 0.000 [-0.007 ; 0.006]       | 0.000 [-0.008 ; 0.007]       |
| Secondary/Vocational education ref: Elementary |                              | -0.105 [-0.307 ; 0.096]      | -0.105 [-0.306 ; 0.095]      |
| University degree or higher ref: Elementary    |                              | 0.037 [-0.298 ; 0.373]       | 0.043 [-0.301 ; 0.386]       |
| Females ref: males                             |                              | 0.093 [-0.068 ; 0.254]       | 0.074 [-0.089 ; 0.237]       |
| Financial status: good. ref: challenging       |                              |                              | 0.144 [-0.098 ; 0.387]       |
| Financial status: fair. ref: challenging       |                              |                              | 0.194 [-0.003 ; 0.392]       |
| Economic activity: employed. ref: unemployed   |                              |                              | 0.084 [-0.178 ; 0.346]       |
| Economic activity: inactive. ref: unemployed   |                              |                              | 0.155 [-0.206 ; 0.517]       |
| Marital status: coupled. ref: single           |                              |                              | 0.015 [-0.152 ; 0.183]       |

<sup>†</sup> Poisson regression model

\*Hungarian general is taken as a reference group in the model.

\*\*Model 1: effect adjusted only for BMI and energy intake; Model 2: effect adjusted for BMI, age, education level, energy intake and sex;

Model 3: effect adjusted for BMI, age, education level, energy intake, sex, financial status, marital status and economic activity.  $\beta$  [95%CI]: beta coefficient of the regression model, accompanied by its corresponding 95% confidence interval.

**Table S5. Regression models for HDI score among Hungarian general and Roma subjects**

| HDI <sup>†</sup>                               | MODEL 1<br>$\beta$ [95%CI]   | MODEL 2<br>$\beta$ [95%CI]   | MODEL 3<br>$\beta$ [95%CI]   |
|------------------------------------------------|------------------------------|------------------------------|------------------------------|
| Roma                                           | 0.038 [-0.131 ; 0.207]       | -0.003 [-0.229 ; 0.223]      | -0.001 [-0.231 ; 0.230]      |
| BMI (kg/m <sup>2</sup> )                       | 0.004 [-0.010 ; 0.018]       | 0.004 [-0.010 ; 0.018]       | 0.004 [-0.010 ; 0.018]       |
| Energy intake (kcal)                           | <b>0.000 [0.000 ; 0.000]</b> | <b>0.000 [0.000 ; 0.000]</b> | <b>0.000 [0.000 ; 0.000]</b> |
| Age (years)                                    |                              | -0.001 [-0.008 ; 0.007]      | 0.001 [-0.007 ; 0.009]       |
| Secondary/Vocational education ref: Elementary |                              | -0.065 [-0.290 ; 0.160]      | -0.070 [-0.296 ; 0.156]      |
| University degree or higher ref: Elementary    |                              | -0.040 [-0.415 ; 0.334]      | -0.044 [-0.426 ; 0.339]      |
| Females ref: males                             |                              | 0.013 [-0.165 ; 0.192]       | 0.012 [-0.168 ; 0.191]       |
| Financial status: good. ref: challenging       |                              |                              | 0.067 [-0.201 ; 0.335]       |
| Financial status: fair. ref: challenging       |                              |                              | 0.107 [-0.110 ; 0.325]       |
| Economic activity: employed. ref: unemployed   |                              |                              | -0.012 [-0.301 ; 0.278]      |
| Economic activity: inactive. ref: unemployed   |                              |                              | -0.089 [-0.488 ; 0.310]      |
| Marital status: coupled. ref: single           |                              |                              | 0.012 [-0.171 ; 0.194]       |

<sup>†</sup> Poisson regression model

\*Hungarian general is taken as a reference group in the model.

\*\*Model 1: effect adjusted only for BMI and energy intake; Model 2: effect adjusted for BMI, age, education level, energy intake and sex;

Model 3: effect adjusted for BMI, age, education level, energy intake, sex, financial status, marital status and economic activity. Significant associations are bolded. HDI: Healthy Diet Indicator [1,6].  $\beta$  [95%CI]: beta coefficient of the regression model, accompanied by its corresponding 95% confidence interval.

**Table S6. Regression models for DII score among Hungarian general and Roma subjects**

| DII <sup>†</sup>                               | MODEL 1<br>$\beta$ [95%CI]     | MODEL 2<br>$\beta$ [95%CI]      | MODEL 3<br>$\beta$ [95%CI]      |
|------------------------------------------------|--------------------------------|---------------------------------|---------------------------------|
| Roma                                           | <b>-0.147 [-0.344 ; 0.049]</b> | <b>-0.450 [-0.709 ; -0.191]</b> | <b>-0.455 [-0.720 ; -0.191]</b> |
| BMI (kg/m <sup>2</sup> )                       | 0.005 [-0.011 ; 0.021]         | 0.006 [-0.010 ; 0.022]          | 0.005 [-0.011 ; 0.022]          |
| Energy intake (kcal)                           | <b>0.001 [0.001 ; 0.001]</b>   | <b>0.001 [0.001 ; 0.001]</b>    | <b>0.001 [0.001 ; 0.001]</b>    |
| Age (years)                                    |                                | 0.002 [-0.007 ; 0.010]          | 0.003 [-0.006 ; 0.012]          |
| Secondary/Vocational education ref: Elementary |                                | -0.502 [-0.760 ; -0.244]        | <b>-0.502 [-0.760 ; -0.244]</b> |
| University degree or higher ref: Elementary    |                                | -0.121 [-0.551 ; 0.309]         | -0.059 [-0.496 ; 0.378]         |
| Females ref: males                             |                                | 0.204 [-0.001 ; 0.409]          | 0.195 [-0.010 ; 0.401]          |
| Financial status: good. ref: challenging       |                                |                                 | 0.019 [-0.288 ; 0.326]          |
| Financial status: fair. ref: challenging       |                                |                                 | <b>0.325 [0.076 ; 0.574]</b>    |
| Economic activity: employed. ref: unemployed   |                                |                                 | -0.115 [-0.447 ; 0.218]         |
| Economic activity: inactive. ref: unemployed   |                                |                                 | -0.196 [-0.649 ; 0.257]         |
| Marital status: coupled. ref: single           |                                |                                 | 0.030 [-0.179 ; 0.239]          |

<sup>†</sup> Multiple linear regression model

\*Hungarian general is taken as a reference group in the model.

**\*\*Model 1: effect adjusted only for BMI and energy intake; Model 2: effect adjusted for BMI, age, education level, energy intake and sex; Model 3: effect adjusted for BMI, age, education level, energy intake, sex, financial status, marital status and economic activity**  
Significant associations are bolded. DII: The Dietary Inflammatory Index [5].  $\beta$  [95%CI]: beta coefficient of the regression model, accompanied by its corresponding 95% confidence interval.

**Table S7. Regression models for nutrient-based EAT-Lancet score among Hungarian general and Roma subjects**

| EAT <sup>†</sup>                              | MODEL 1<br>$\beta$ [95%CI]   | MODEL 2<br>$\beta$ [95%CI]   | MODEL 3<br>$\beta$ [95%CI]   |
|-----------------------------------------------|------------------------------|------------------------------|------------------------------|
| Roma                                          | 0.021 [-0.073 ; 0.114]       | -0.024 [-0.183 ; 0.136]      | -0.017 [-0.179 ; 0.144]      |
| BMI (kg/m <sup>2</sup> )                      | 0.005 [-0.019 ; 0.029]       | 0.003 [-0.021 ; 0.027]       | 0.006 [-0.019 ; 0.030]       |
| Energy intake (kcal)                          | <b>0.000 [0.000 ; 0.000]</b> | <b>0.000 [0.000 ; 0.000]</b> | <b>0.000 [0.000 ; 0.000]</b> |
| BMI (kg/m <sup>2</sup> )*Energy intake (kcal) | <b>0.000 [0.000 ; 0.000]</b> | <b>0.000 [0.000 ; 0.000]</b> | <b>0.000 [0.000 ; 0.000]</b> |
| Age (years)                                   |                              | 0.002 [-0.002 ; 0.006]       | 0.003 [-0.001 ; 0.008]       |
| Secondary education ref: Elementary           |                              | -0.042 [-0.242 ; 0.157]      | -0.065 [-0.266 ; 0.136]      |
| Vocational or higher ref: Elementary          |                              | -0.067 [-0.235 ; 0.101]      | -0.093 [-0.264 ; 0.078]      |
| Secondary/Vocational education*Roma           |                              | 0.026 [-0.293 ; 0.344]       | 0.065 [-0.256 ; 0.386]       |
| Vocational or higher*Roma                     |                              | 0.049 [-0.267 ; 0.364]       | 0.086 [-0.234 ; 0.407]       |
| Females ref: males                            |                              | 0.018 [-0.082 ; 0.119]       | 0.019 [-0.082 ; 0.120]       |
| Financial status: good. ref: challenging      |                              |                              | 0.156 [0.005 ; 0.307]        |
| Financial status: fair. ref: challenging      |                              |                              | 0.111 [-0.013 ; 0.234]       |
| Economic activity: employed. ref: unemployed  |                              |                              | 0.036 [-0.129 ; 0.200]       |
| Economic activity: inactive. ref: unemployed  |                              |                              | 0.019 [-0.204 ; 0.241]       |
| Marital status: coupled. ref :single          |                              |                              | 0.028 [-0.075 ; 0.130]       |

<sup>†</sup> Poisson regression model

\*Hungarian general is taken as a reference group in the model.

**\*\*Model 1: effect adjusted only for BMI and energy intake; Model 2: effect adjusted for BMI, age, education level, energy intake and sex; Model 3: effect adjusted for BMI, age, education level, energy intake, sex, financial status, marital status and economic activity**  
Significant associations are bolded. EAT: Nutrient-based EAT-Lancet score [7];  $\beta$  [95%CI]: beta coefficient of the regression model, accompanied by its corresponding 95% confidence interval.

## References

1. Nishida, C.; Uauy, R.; Kumanyika, S.; Shetty, P. The joint WHO/FAO expert consultation on diet, nutrition and the prevention of chronic diseases: process, product and policy implications. *Public Health Nutr* **2004**, *7*, 245-250, doi:10.1079/phn2003592.
2. Willett, W.; Rockström, J.; Loken, B.; Springmann, M.; Lang, T.; Vermeulen, S.; Garnett, T.; Tilman, D.; DeClerck, F.; Wood, A. Food in the Anthropocene: the EAT–Lancet Commission on healthy diets from sustainable food systems. *Lancet* **2019**, *393*, 447-492, doi:10.1016/S0140-6736(18)31788-4.
3. Mellen, P.B.; Gao, S.K.; Vitolins, M.Z.; Goff, D.C., Jr. Deteriorating Dietary Habits Among Adults With Hypertension: DASH Dietary Accordance, NHANES 1988-1994 and 1999-2004. *JAMA Intern Med* **2008**, *168*, 308-314, doi:10.1001/archinternmed.2007.119.
4. Sacks, F.M.; Obarzanek, E.; Windhauser, M.M.; Svetkey, L.P.; Vollmer, W.M.; McCullough, M.; Karanja, N.; Lin, P.H.; Steele, P.; Proschan, M.A., et al. Rationale and design of the Dietary Approaches to Stop Hypertension trial (DASH). A multicenter controlled-feeding study of dietary patterns to lower blood pressure. *Annals of epidemiology* **1995**, *5*, 108-118, doi:10.1016/1047-2797(94)00055-x.
5. Shivappa, N.; Steck, S.E.; Hurley, T.G.; Hussey, J.R.; Hébert, J.R. Designing and developing a literature-derived, population-based dietary inflammatory index. *Public Health Nutr* **2014**, *17*, 1689-1696, doi:10.1017/S1368980013002115.
6. WHO. Healthy diet: key facts. World Health Organization: Geneva, Switzerland, 2020.
7. Willett, W.; Rockström, J.; Loken, B.; Springmann, M.; Lang, T.; Vermeulen, S.; Garnett, T.; Tilman, D.; DeClerck, F.; Wood, A., et al. Food in the Anthropocene: the EAT-Lancet Commission on healthy diets from sustainable food systems. *Lancet* **2019**, *393*, 447-492, doi:10.1016/S0140-6736(18)31788-4.
